# Supplementary material for: Enlarged perivascular spaces as a marker of underlying arteriopathy in intracerebral haemorrhage: a multicentre MRI cohort study
Source: PubMed Central journal article supplement — J Neurol Neurosurg Psychiatry. 2013 Feb 14;84(6):624–9. doi: 10.1136/jnnp-2012-304434 (PMC3905629; doi:10.1136/jnnp-2012-304434), 2013-02-14
Supplement: jnnp-2012-304434-s1.pdf [file jnnp-2012-304434-s1.pdf]

## **Supplementary material**

**Supplementary Table 1. Details of basic MR imaging parameters.**

|                                                                                                                                                                                                                                                                                                                                                                                                                                                       |
|-------------------------------------------------------------------------------------------------------------------------------------------------------------------------------------------------------------------------------------------------------------------------------------------------------------------------------------------------------------------------------------------------------------------------------------------------------|
| <p><b>University College London Hospitals NHS Foundation Trust, UK</b></p> <p>MRIs were carried at 1.5T field strength. T2-weighted sequences were acquired in the axial plane with parameters as follows: slice thickness 5 mm, slice gap 1-2 mm, echo time 100–106 ms, repetition time 4763/6000. Axial T2*-GRE images were obtained at: repetition time 300/800 ms, echo time 40/26 ms, slice thickness 5 mm, slice gap 1.5 mm.</p>                |
| <p><b>Cliniques Universitaires Saint Luc, Brussels, Belgium</b></p> <p>MRIs were carried at 1.5T field strength. T2-weighted sequences were acquired in the axial plane with parameters as follows: slice thickness 4-5 mm, slice gap 1 mm, echo time 89–90 ms, repetition time 4768/6040. Axial T2*-GRE sequences were acquired, with parameters as follows: repetition time 230–240 ms, echo time 50–70 ms, slice thickness 5 mm, gap 1 mm.</p>     |
| <p><b>Addenbrooke's Hospital, Cambridge, UK</b></p> <p>MRIs were carried out at 1.5T field strength. T2-weighted sequences were acquired in the axial plane with parameters as follows: slice thickness 4-5 mm, slice gap 1-3 mm, echo time 80–100 ms. T2*-GRE sequences were obtained in the axial plane using the following parameters: repetition time 460–660 ms, echo time 15 ms, field of view 22 cm, slice thickness 6 mm, slice gap 7 mm.</p> |
| <p><b>CHU Mont-Godinne UCL, Belgium</b></p> <p>MRIs were carried at 1.5T field strength. T2-weighted sequences were acquired in the axial plane with parameters as follows: slice thickness 5 mm, slice gap 1-2 mm, echo time 85–100 ms, repetition time 6000. T2*-GRE sequences were obtained in the axial plane: repetition time 921 ms, echo time 22 ms, slice thickness 4 mm, slice gap 10%.</p>                                                  |

### **Relative distribution of EPVS in the CSO and BG between ICH categories**

Within group comparisons of the proportion of patients with severe (>40) CSO EPVS vs. frequent-to-severe (>20) BG EPVS for strictly lobar ICH (i.e. probable and possible CAA) and other ICH showed a significance difference for strictly lobar ICH (35.5% in the CSO vs. 4% in the BG;  $p<0.0001$ ), but no difference for the other ICH cases (17.8% in the CSO vs. 20% in the BG;  $p=0.788$ ).

Supplementary Table 2. Associations between the severity of centrum semiovale and basal ganglia EPVS. A comparison using chi square test across categories, showed no significant relationship between EPVS severity in the two anatomical areas (p=0.100 for trend).

| <b>N (%)</b>              | <b>Centrum semiovale EPVS</b> |                 |                 |             |              |
|---------------------------|-------------------------------|-----------------|-----------------|-------------|--------------|
| <b>Basal ganglia EPVS</b> | Mild: 1-10                    | Moderate: 11-20 | Frequent: 21-40 | Severe: >40 | <i>Total</i> |
| No EPVS                   | 1 (14.29)                     | 0 (0)           | 1 (2.33)        | 0 (0)       | 2 (1.65)     |
| Mild: 1-10                | 2 (28.57)                     | 23 (63.89)      | 21 (48.84)      | 24 (68.57)  | 70 (57.85)   |
| Moderate: 11-20           | 2 (28.57)                     | 11 (30.56)      | 16 (37.21)      | 8 (22.86)   | 37 (30.58)   |
| Frequent: 21-40           | 2 (28.57)                     | 2 (5.56)        | 5 (11.63)       | 2 (5.71)    | 11 (9.09)    |
| Severe: >40               | 0 (0)                         | 0 (0)           | 0 (0)           | 1 (2.86)    | 1 (0.83)     |
| <i>Total</i>              | 7 (100)                       | 36 (100)        | 43 (100)        | 35 (100)    | 121 (100)    |

## Factors associated with increasing severity of EPVS

After comparing the three severity categories of EPVS in the CSO and BG for clinical and radiological risk factors associated with increasing severity (all the variables shown in Table 1), smoking history ( $p=0.05$ ), non-CAA related ICH ( $p=0.001$ ) and mean WMC score ( $p<0.00001$ ) (Supplementary Figure 1) were significantly associated with increasing severity of BG EPVS; only increasing mean age was significantly associated with increasing severity of CSO EPVS ( $p=0.03$ ) (data not shown).

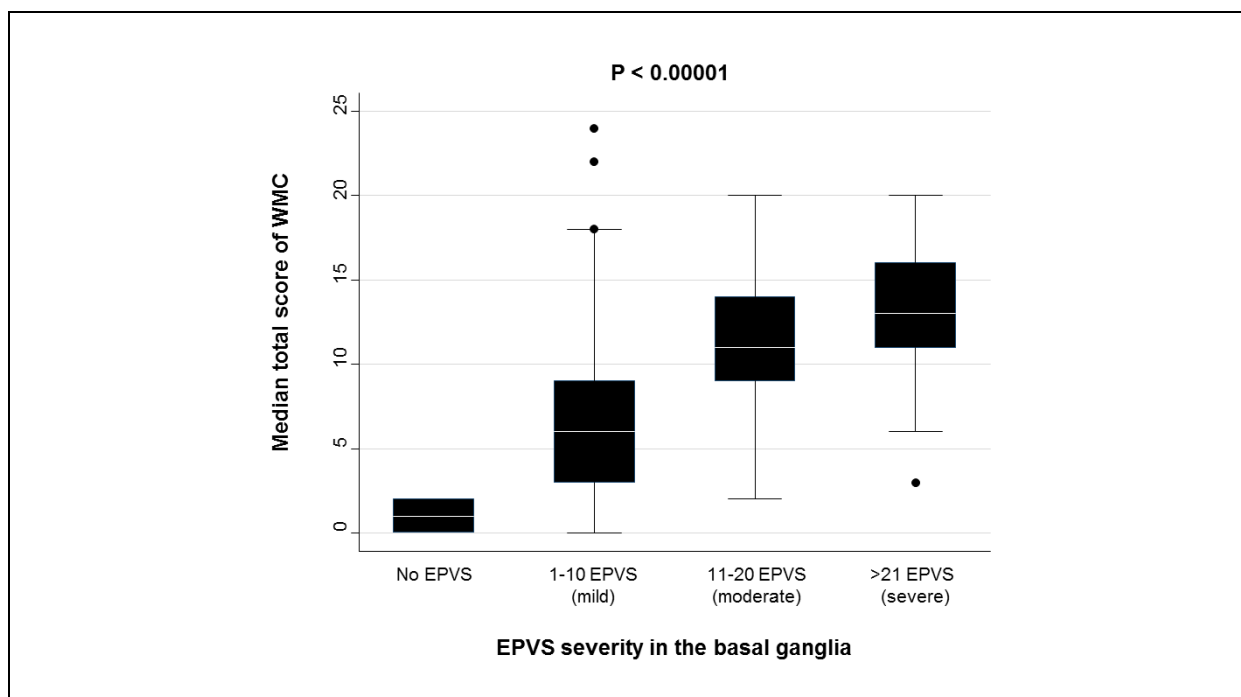

**Supplementary Figure 1.** Box and whisker plots illustrating white matter changes (WMC) score distributions according to enlarged perivascular spaces (EPVS) severity category in the basal ganglia. Comparisons were performed using ANOVA.

**Supplementary Table 3. Univariable (unadjusted) ordinal logistic regression analysis showing predictors of increased total EPVS severity in the whole cohort.**

|                                                  | Total EPVS              |              |
|--------------------------------------------------|-------------------------|--------------|
|                                                  | OR (95% CI)             | P-Value      |
| Age (per 10 years older)                         | <b>1.43 (1.07-1.92)</b> | <b>0.016</b> |
| Sex, male                                        | 0.56 (0.29-1.08)        | 0.083        |
| History of hypertension (Yes vs. No)             | 0.67 (0.32-1.39)        | 0.280        |
| History of smoking (Yes vs. No)                  | <b>2.24 (1.09-4.62)</b> | <b>0.028</b> |
| Diabetes (Yes vs. No)                            | 0.94 (0.38-2.29)        | 0.888        |
| On statins (Yes vs. No)                          | 0.80 (0.36-1.79)        | 0.593        |
| On antithrombotics (Yes vs. No)                  | 0.65 (0.32-1.32)        | 0.231        |
| First ever ICH, n yes (%)                        | 0.83 (0.41-1.67)        | 0.595        |
| CAA-related ICH (Yes vs. No)                     | 0.75 (0.38-1.47)        | 0.398        |
| Lacunar infarct (Yes vs. No)                     | 2.79 (0.99-7.84)        | 0.052        |
| Multiple ICHs (Yes vs. No)                       | 0.94 (0.48-1.82)        | 0.847        |
| CMBs presence (Yes vs. No)                       | 1.92 (0.92-3.99)        | 0.081        |
| Strictly lobar CMBs (Yes vs. No)                 | 1.26 (0.65-2.44)        | 0.496        |
| Lobar CMBs (Yes vs. No)                          | 1.86 (0.91-3.81)        | 0.091        |
| Deep CMBs (Yes vs. No)                           | 1.43 (0.68-3.03)        | 0.348        |
| Mean total WMC score<br>(for each unit increase) | <b>1.10 (1.03-1.18)</b> | <b>0.003</b> |

### **Predictors of total EPVS severity in the whole cohort**

In univariable ordinal logistic regression analysis, significant predictors of increasing total EPVS severity were age, smoking and mean WMC score (Supplementary Table 2). Gender, presence of lacunar infarct and presence of CMBs had a marginal effect (Supplementary Table 3). In an adjusted model including presence of lacunes, lobar and deep CMBs, age (OR: 1.38, per 10 years increase; 95%CI: 1.02-1.87; p=0.036) and WMC (OR: 1.12; 95%CI: 1.04-1.20; p=0.002) were still independent predictors of severe total EPVS (Supplementary Table 4).

**Supplementary Table 4.** Multivariable (adjusted) ordinal logistic regression analysis showing predictors of increased total EPVS severity in the whole cohort.

|                                                  | Total EPVS              |              |
|--------------------------------------------------|-------------------------|--------------|
|                                                  | OR (95%CI)              | P-Value      |
| Age<br>(per 10 years older)                      | <b>1.38 (1.02-1.87)</b> | <b>0.036</b> |
| Lobar microbleeds<br>(Yes vs. No)                | 2.63 (0.28-25.15)       | 0.401        |
| Deep microbleeds<br>(Yes vs. No)                 | 1.75 (0.21-14.76)       | 0.609        |
| Mean total WMC score<br>(for each unit increase) | <b>1.12 (1.04-1.20)</b> | <b>0.002</b> |
| Lacunar infarct<br>(Yes vs. No)                  | 1.00 (0.99-1.01)        | 0.913        |
